# Supplementary material for: Access to tough and transparent nanocomposites via Pickering emulsion polymerization using biocatalytic hybrid lignin nanoparticles as functional surfactants
Source: Royal Society of Chemistry journal article supplement (doi:10.1039/d1gc00103e), 2021-01-01
Supplement: d1gc00103e1.pdf [file d1gc00103e1.pdf]

## Supplementary Information for

# **Access to Tough and Transparent Nanocomposites via Pickering Emulsion Polymerization using Biocatalytic Hybrid Lignin Nanoparticles as Functional Surfactants**

Adrian Moreno<sup>a</sup> Mohammad Morsali<sup>a</sup>, Jinrong Liu<sup>a</sup> and Mika H. Sipponen<sup>a\*</sup>

<sup>a</sup>*Department of Materials and Environmental Chemistry, Stockholm University, 10691, Stockholm (Sweden)*

*\*Corresponding author: [mika.sipponen@mmk.su.se](mailto:mika.sipponen@mmk.su.se)*

This supporting information contains:

Total number of pages: 16

Total number of Figures: 12

Total number of Schemes: 1

Total number of Tables: 12

Table S1 show the main characteristics of lignin colloidal dispersions during and after the two step adsorption immobilization process.

**Table S1.** Characteristics of the colloidal lignin particles (LNPs) prepared in this work.<sup>a</sup> Data was reproduced from a previous study.<sup>1</sup>

| Lignin form               | hydrodynamic diameter (nm) | PDI           | Zeta potential (mV) |
|---------------------------|----------------------------|---------------|---------------------|
| LNPs <sup>b</sup>         | 97 ± 2.5                   | 0.026 ± 0.010 | -29.7 ± 3.8         |
| chi-LNPs <sup>c</sup>     | 190 ± 2.1                  | 0.24 ± 0.152  | +31.9 ± 3.2         |
| GOx-chi-LNPs <sup>d</sup> | 215 ± 5.6                  | 0.27 ± 0.096  | +41.9 ± 2.0         |

<sup>a</sup>At least three measurements were completed for each parameter. Error ranges correspond to one standard deviation.

<sup>b</sup>Values measured at native pH (3.8). <sup>c</sup>Values measured at pH 4 in 15 mM NaOAc buffer. <sup>d</sup>Values measured at pH 5.5 in 15 mM NaOAc buffer.

Table S2 show GOx activity before (GOx) and after (GOx-chi-LNPs) immobilization step. Scheme 1 show the reaction employed to determine the enzyme activity: The oxidation of D-glucose using hydroquinone as an electron acceptor in the presence of GOx or GOx-chi-LNPs.

**Table S2.** Comparison of apparent catalytic constants of free and immobilized GOx enzyme at room temperature.<sup>a</sup> Data was reproduced from a previous study.<sup>1</sup>

| Enzyme status              | $K_m$ (M)                        | $V_{max}$ (M s <sup>-1</sup> ) |
|----------------------------|----------------------------------|--------------------------------|
| Free (GOx)                 | (5.70 ± 0.26) x 10 <sup>-3</sup> | 2.64 x 10 <sup>-2</sup>        |
| Immobilized (GOx-chi-CLPs) | (7.00 ± 0.23) x 10 <sup>-3</sup> | 1.92 x 10 <sup>-2</sup>        |

<sup>a</sup>At least three measurements were completed for each parameter. Error ranges corresponds to one standard deviation.

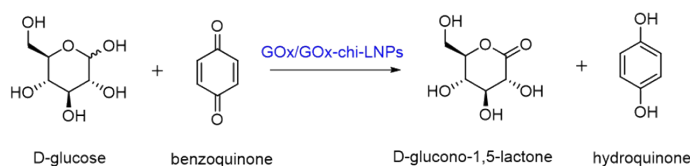

**Scheme 1.** Oxidation of D-glucose in the presence of hydroquinone catalyzed by GOx or GOx-chiLNPs.

Figure S1 show the evolution of droplet size in Styrene-Pickering emulsions stabilized by GOx-chi-LNPs at different concentration range.

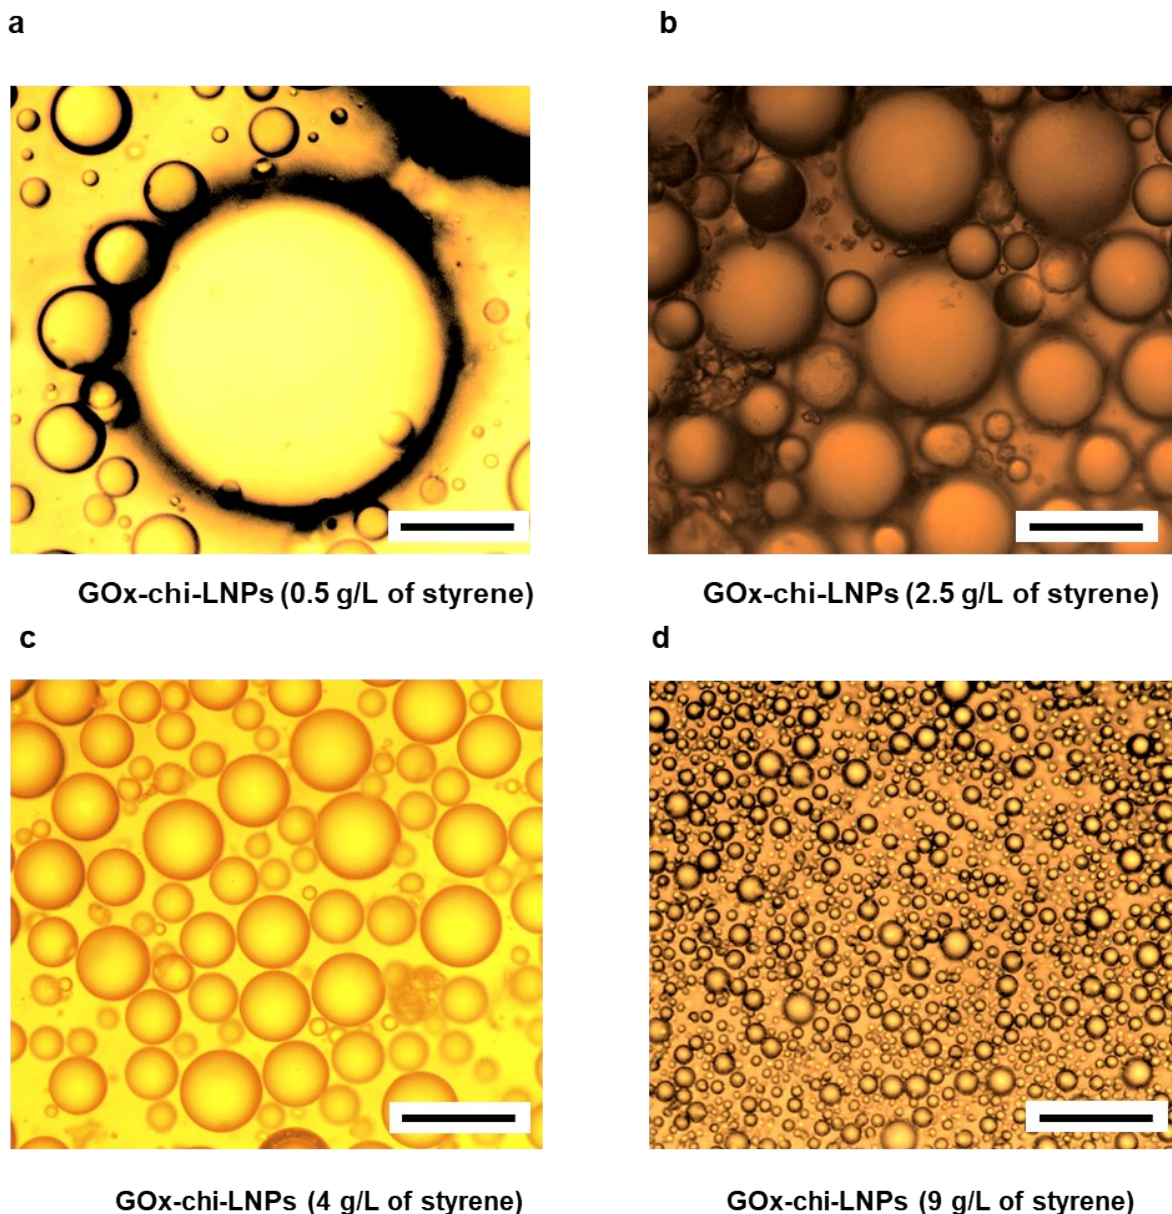

**Figure S1.** Optical microscope images of Styrene-Pickering emulsions stabilized by GOx-chi-LNPs at different concentrations ranges: (a) 0.5 g of GOx-chi-LNPs per L of styrene, (b) 2.5 g of GOx-chi-LNPs per L of styrene, (c) 4 g of GOx-chi-LNPs per L of styrene and (d) 9 g of GOx-chi-LNPs per L of styrene. Scale bars (100  $\mu\text{m}$ ).

Figure S2 show the creaming process present in the emulsions with less amount of GOx-chi-CLPs (a and b) due to a less efficient stabilization process from GOx-chi-LNPs.

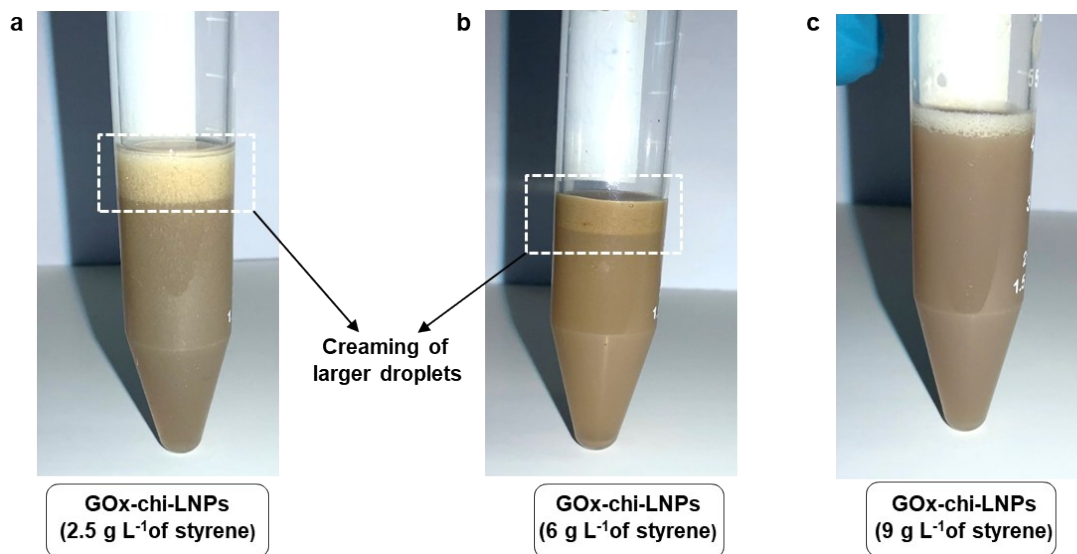

**Figure S2.** Digital images corresponding to Styrene-Pickering emulsions stabilized by GOx-chi-LNPs at different concentrations ranges: (a) 2.5 g of GOx-chi-LNPs per L of styrene, (b) 6 g of GOx-chi-LNPs per L of styrene, (c) 9 g of GOx-chi-LNPs per L of styrene.

Figure S3 show the digital images corresponding to the latex dispersions obtained after the FRP of Styrene-Pickering emulsions using as stabilizer GOx-chi-LNPs. Figure S3b reveals the coagulum of the latex dispersion due to an insufficient amount of GOx-chi-LNPs, while in Figure S3d a stable latex dispersion was obtained after increase the amount of GOx-chi-LNPs.

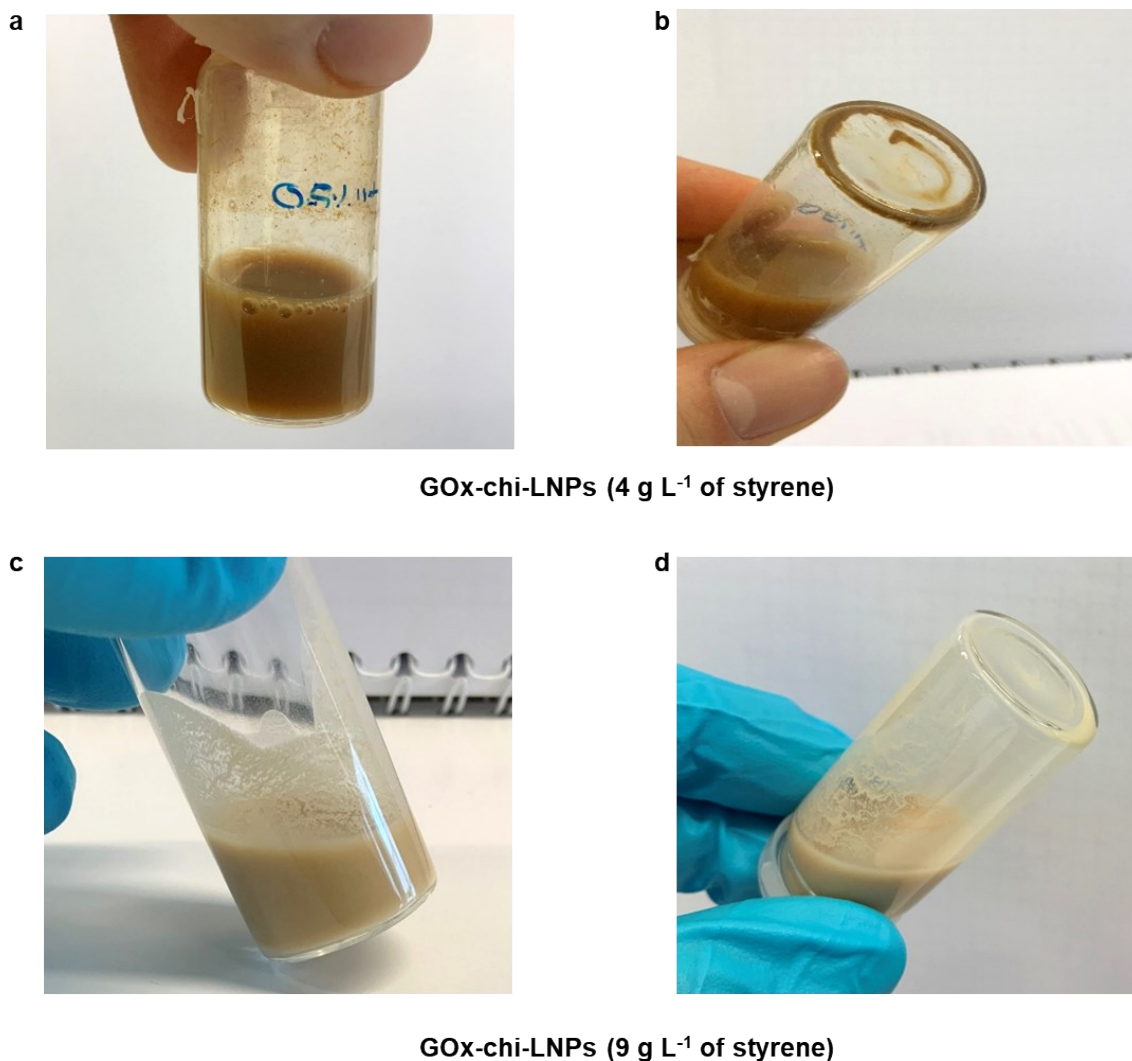

**Figure S3.** Digital images of Styrene-Pickering emulsions after FRP process stabilized by GOx-chi-LNPs at different concentrations ranges: (a and b) 4 g of GOx-chi-LNPs per L of styrene and (c and d) 9 g of GOx-chi-LNPs per L of styrene.

Figure S4 show the scheme of the enzymatic tandem reaction used to determine the remaining amount of glucose in latex dispersions after the polymerization and the UV-absorbance spectra of oxidized *o*-dianisidine confirming the presence of glucose in the supernatant original sample.

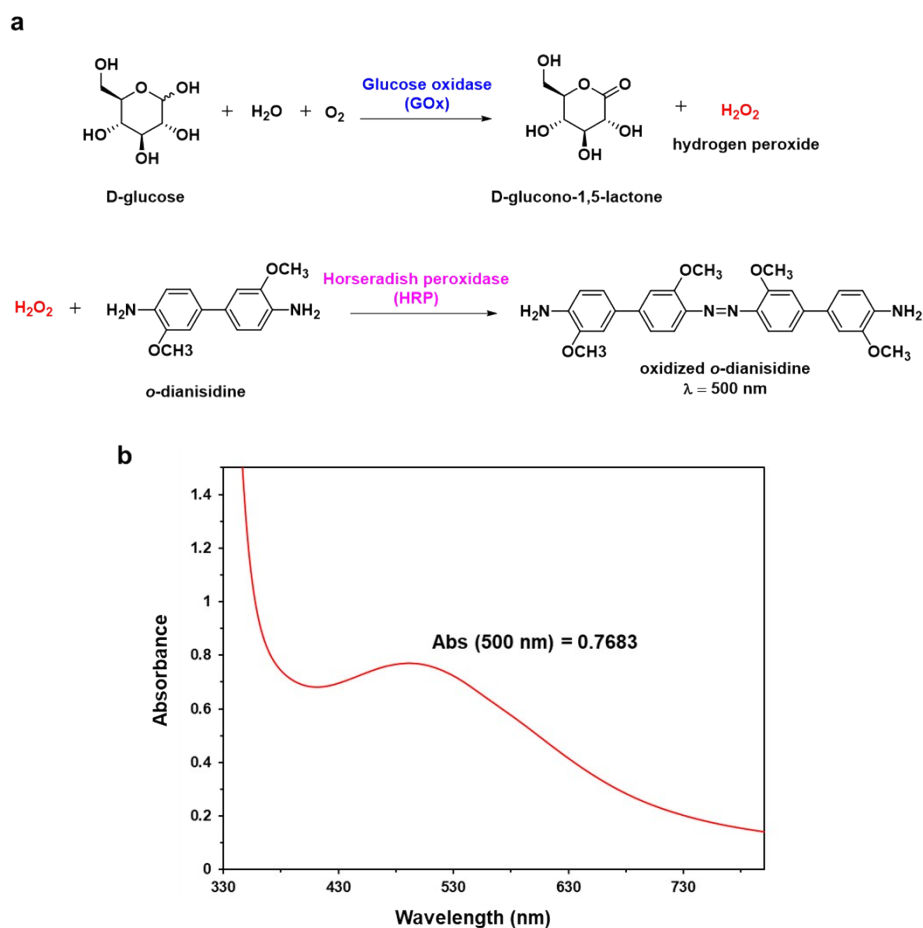

**Figure S4.** (a) Scheme of enzymatic tandem model reaction used to determine the amount of remaining glucose after the polymerization reaction. (b) UV-visible spectra of reaction mixture showing the formation of the oxidized form of *o*-dianisidine as consequence of the cascade reaction. Reaction conditions: 25  $\mu$ L of purified supernatant solution from latex dispersions, [GOx] = 15 mg/mL [HRP] = 20 mg/mL and [*o*-dianisidine] = 9.1 mM Reaction media: pH 6 in 15 mM NaOAc buffer. Total volume reaction = 4 mL.

Figure S5 show SEM characterization images of purified PS microparticles after basic treatment. Magnification in b, reveal remaining GOx-chi-LNPs in the surface of the PS microparticle.

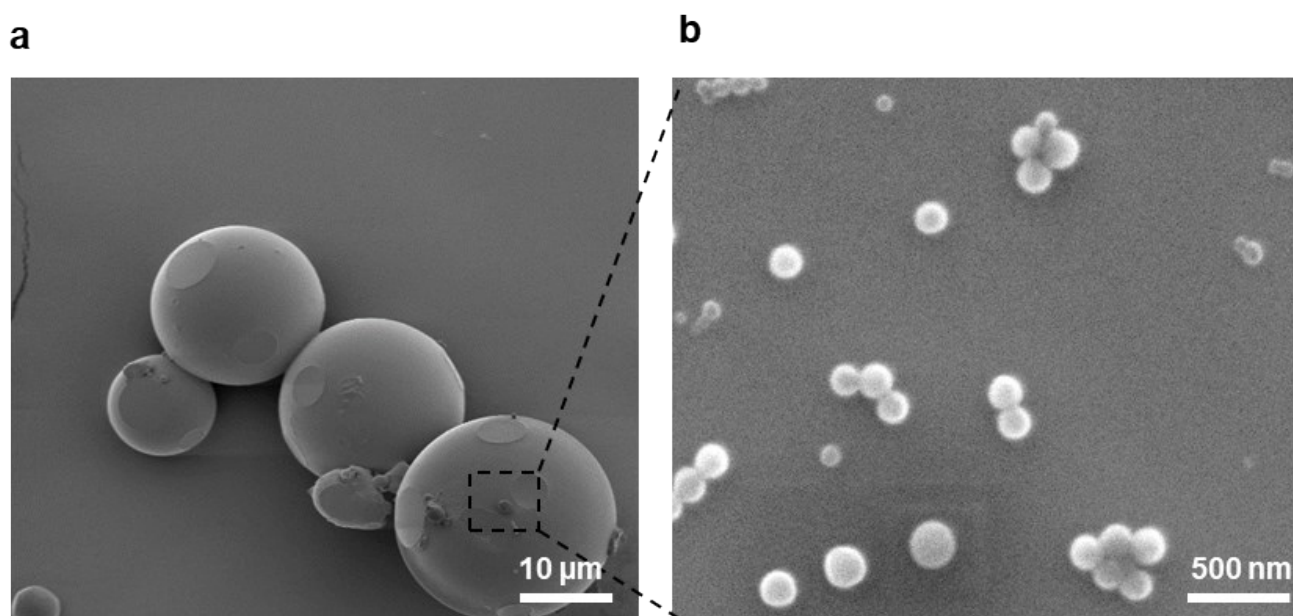

**Figure S5.** (a and b) SEM images of bare PS microbeads after FRP at 65 °C and treatment with basic solution (NH<sub>4</sub>OH, 35 wt %)

Figure S6 show the TGA analysis of GOx-chi-LNPs-coated PS microparticles before (a and b) and after (c and d) treatment with basic solution (NH<sub>4</sub>OH, 35 wt %). Magnification of char residue (7 wt % vs 0.1 wt %) demonstrate an efficient removal of most part of GOx-chi-LNPs after the basic treatment.

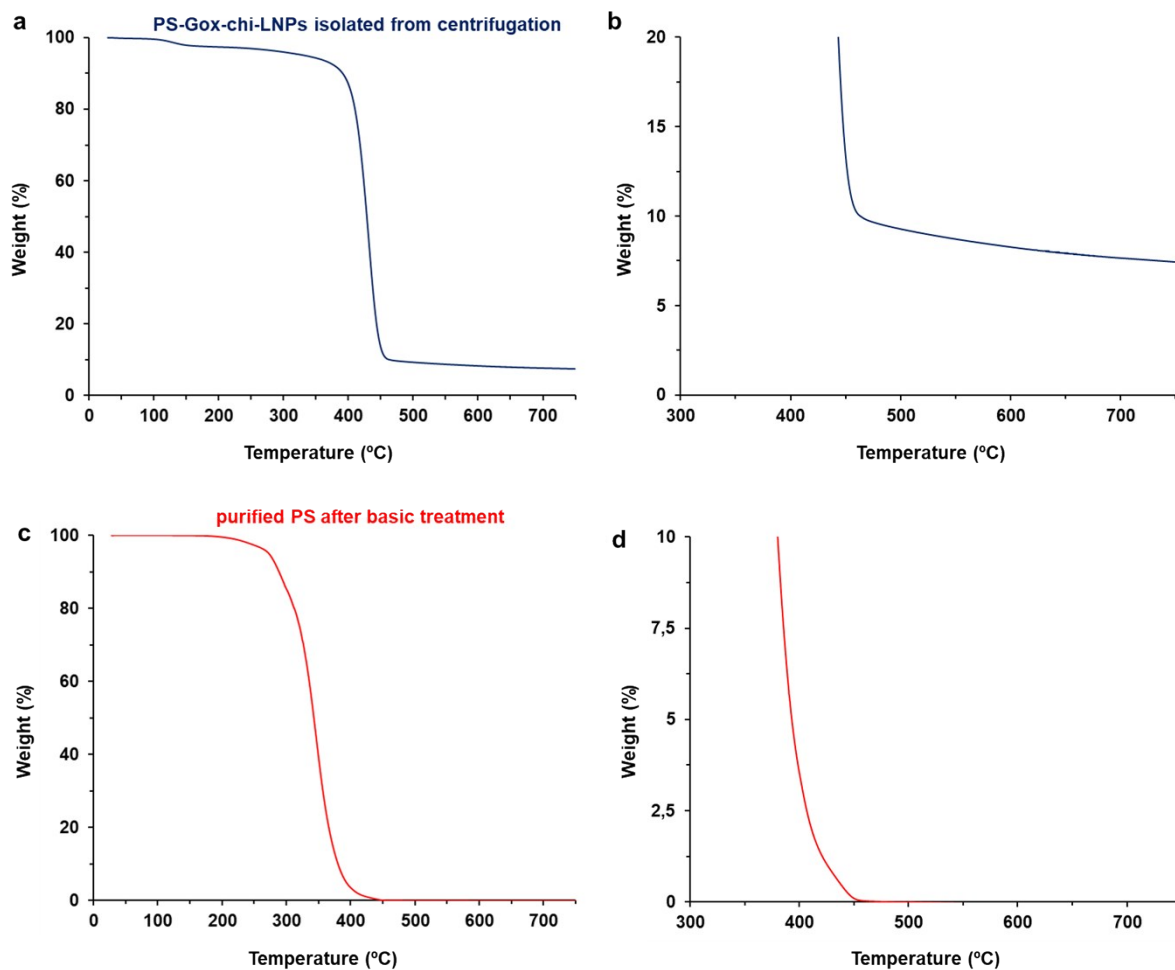

**Figure S6.** TGA analysis curves for (a) bare PS microparticles and (b) GOx-chi-LNPs coated PS microparticles (GOx-chi-LNPs, 2.5 wt %). (b and d) are magnification of the end thermal residue for bare PS microparticles and GOx-chi-LNPs coated PS microparticles, respectively.



Figure S7 display digital images for de-emulsification in basic conditions, and re-emulsification (by restoring original pH) process for PS-latex dispersions stabilized with GOx-chi-LNPs.

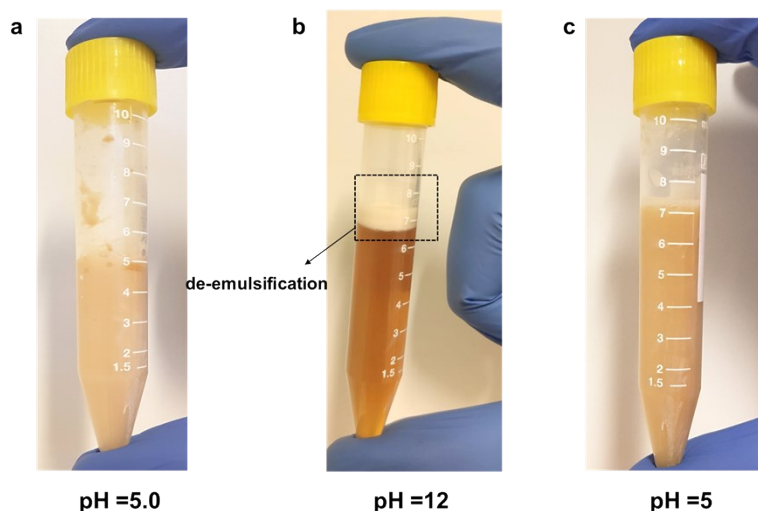

**Figure S7.** pH-responsive behavior of PS-Pickering emulsion latex dispersion stabilized by GOx-chi-LNPs (5 wt %).

Figure S8 show the appearance of PS latex dispersion stabilized with GOx-chi-LNPs (2.5 and 15 wt %) before (a and c), and after melting process at 160 °C (b and d).

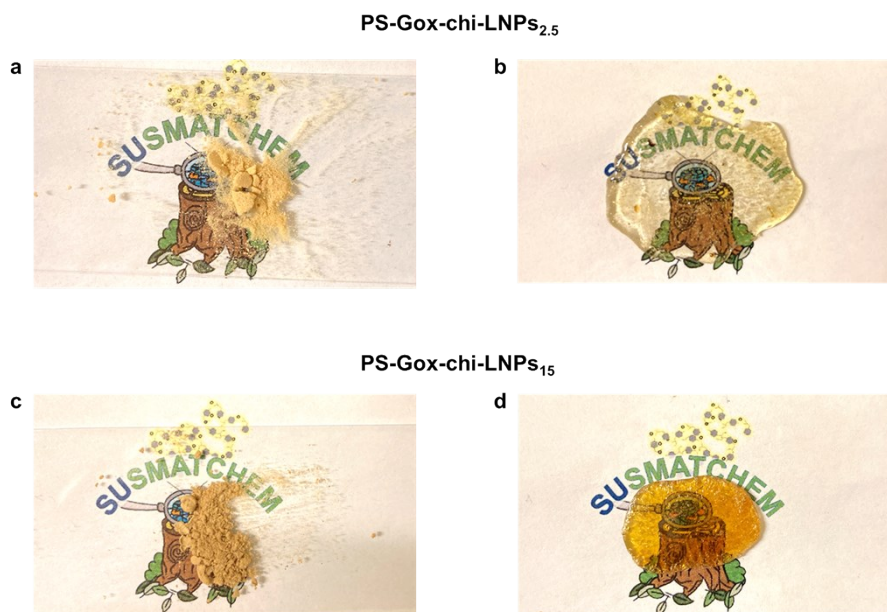

**Figure S8.** Digital images of GOx-chi-LNPs-PS particles (a and c) isolated from latex dispersion (2.5 and 15 wt%, respectively). (b and d) Digital images of PS-GOx-chi-LNPs composite film obtained after melt-pressing process of particles shown on (a and c).

Figure S9 show the morphology and distribution of GOx-chi-LNPs in PBMA-GOx-chi-LNPs composite films with 2.5 and 15 wt % of GOx-chi-LNPs, respectively.

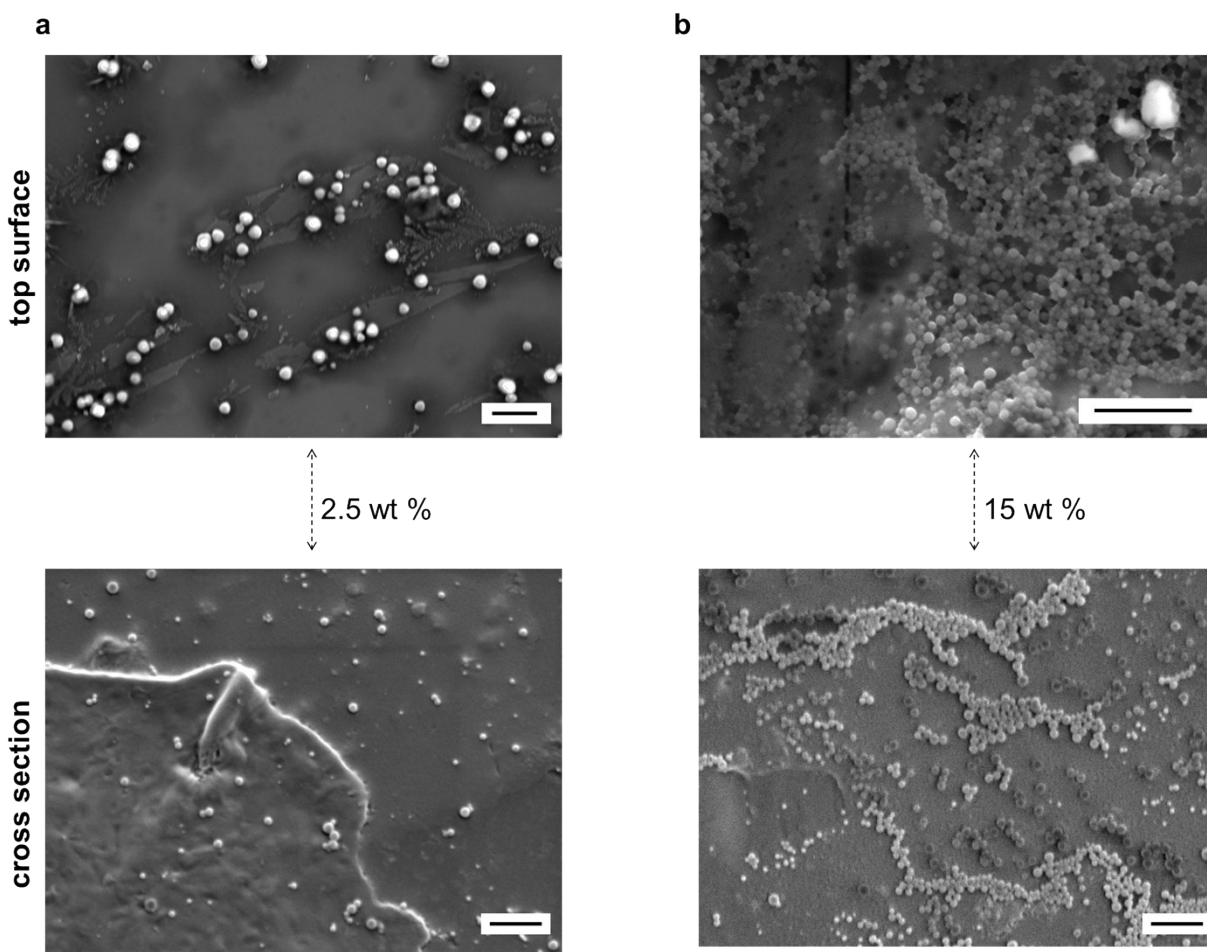

**Figure S9.** SEM micrographs of top and cross-sectional surfaces of PBMA-GOx-chi-LNPs composite films at: (a) GOx-chi-LNPs 2.5 wt % (b) GOx-chi-LNPs 15 wt %. Scale bars (1 μm)

Table S3 and S4 summarize the mechanical properties of PS- and PBMA-GOx-chi-LNPs composites.

**Table S3.** Mechanical properties for PS and PS-GOx-chi-LNPs composites

| Material                       | Young's modulus (MPa) | Tensile stress (MPa) | Strain at break (%) | Toughness (MJ/m <sup>3</sup> ) |
|--------------------------------|-----------------------|----------------------|---------------------|--------------------------------|
| PS                             | 1484.5 ± 81.7         | 12.3 ± 1.72          | 1.31 ± 0.35         | 0.10 ± 0.03                    |
| PS-GOx-chi-LNPs <sub>2.5</sub> | 1863.7 ± 114.3        | 21.8 ± 2.26          | 1.77 ± 0.34         | 0.24 ± 0.03                    |
| PS-GOx-chi-LNPs <sub>5</sub>   | 2308.9 ± 72.3         | 23.1 ± 1.16          | 1.63 ± 0.12         | 0.27 ± 0.02                    |
| PS-GOx-chi-LNPs <sub>10</sub>  | 2627.6 ± 116.2        | 26.6 ± 1.19          | 1.63 ± 0.04         | 0.29 ± 0.01                    |
| PS-GOx-chi-LNPs <sub>15</sub>  | 3050.4 ± 120.0        | 29.8 ± 1.96          | 1.69 ± 0.31         | 0.35 ± 0.02                    |
| PS-GOx-chi-LNPs <sub>20</sub>  | 2354.3 ± 149.7        | 21.4 ± 0.97          | 1.35 ± 0.30         | 0.21 ± 0.03                    |
| PS-GOx-chi-LNPs <sub>30</sub>  | 2148.4 ± 115.1        | 22.2 ± 1.33          | 1.74 ± 0.03         | 0.26 ± 0.01                    |

**Table S4.** Mechanical properties of PBMA and PBMA-GOx-chi-LNPs composites

| Material                         | Young's modulus (MPa) | Tensile stress (MPa) | Strain at break (%) | Toughness (MJ/m <sup>3</sup> ) |
|----------------------------------|-----------------------|----------------------|---------------------|--------------------------------|
| PBMA                             | 0.92 ± 0.05           | 0.24 ± 0.05          | 316.3 ± 61.9        | 0.53 ± 0.16                    |
| PBMA-GOx-chi-LNPs <sub>2.5</sub> | 2.6 ± 0.50            | 0.69 ± 0.26          | 398.1 ± 29.8        | 1.67 ± 0.47                    |
| PBMA-GOx-chi-LNPs <sub>5</sub>   | 5.0 ± 0.22            | 0.87 ± 0.12          | 375.4 ± 45.6        | 2.14 ± 0.31                    |
| PBMA-GOx-chi-LNPs <sub>10</sub>  | 8.2 ± 0.97            | 1.58 ± 0.11          | 381.4 ± 55.1        | 4.13 ± 0.53                    |
| PBMA-GOx-chi-LNPs <sub>15</sub>  | 12.6 ± 1.41           | 3.36 ± 0.31          | 334.2 ± 23.1        | 8.04 ± 1.37                    |
| PBMA-GOx-chi-LNPs <sub>20</sub>  | 8.7 ± 1.04            | 2.16 ± 0.11          | 338.4 ± 8.8         | 5.41 ± 1.29                    |
| PBMA-GOx-chi-LNPs <sub>30</sub>  | 7.7 ± 0.40            | 2.07 ± 0.22          | 329.2 ± 28.7        | 5.18 ± 1.31                    |

Table S5-S12 summarize statistical analysis of PS- and PBMA-GOx-chi-LNPs provided by one-way analysis of variance (ANOVA) with Tukey's honest significant difference (HSD) all-pairwise comparison test at a significance level of  $p < 0.05$ . The results summarized indicate that the introduction of GOx-chi-LNPs into the polymeric matrix (15 wt %) improve significantly the mechanical properties in both cases (PS and PBMA) in comparison to pristine polymeric materials.

**Table S5.** Statistical analysis of Young's modulus values of PS and PS-GOx-chi-LNPs composite films. One-way ANOVA with Tukey's honest significant difference (HSD) all-pairwise comparison test ( $p < 0.05$ ).  $df = 6$  (between) and 21 (within),  $F=106.79$  Italic letters *a-f* indicates statistically significant difference between different groups.

| Material | PS       | PS-GOx-chi-LNPs <sub>2.5</sub> | PS-GOx-chi-LNPs <sub>5</sub> | PS-GOx-chi-LNPs <sub>10</sub> | PS-GOx-chi-LNPs <sub>15</sub> | PS-GOx-chi-LNPs <sub>20</sub> | PS-GOx-chi-LNPs <sub>30</sub> |
|----------|----------|--------------------------------|------------------------------|-------------------------------|-------------------------------|-------------------------------|-------------------------------|
| Group    | <i>a</i> | <i>b</i>                       | <i>c</i>                     | <i>d</i>                      | <i>e</i>                      | <i>c</i>                      | <i>f</i>                      |

**Table S6.** Statistical analysis of tensile strength values of PS and PS-GOx-chi-LNPs composite films. One-way ANOVA with Tukey's honest significant difference (HSD) all-pairwise comparison test ( $p < 0.05$ ).  $df = 6$  (between) and 21 (within),  $F=44.96$  Italic letters *a-d* indicates statistically significant difference between different groups.

| Material | PS       | PS-GOx-chi-LNPs <sub>2.5</sub> | PS-GOx-chi-LNPs <sub>5</sub> | PS-GOx-chi-LNPs <sub>10</sub> | PS-GOx-chi-LNPs <sub>15</sub> | PS-GOx-chi-LNPs <sub>20</sub> | PS-GOx-chi-LNPs <sub>30</sub> |
|----------|----------|--------------------------------|------------------------------|-------------------------------|-------------------------------|-------------------------------|-------------------------------|
| Group    | <i>a</i> | <i>b</i>                       | <i>b</i>                     | <i>c</i>                      | <i>d</i>                      | <i>b</i>                      | <i>b</i>                      |

**Table S7.** Statistical analysis of strain at failure values of PS and PS-GOx-chi-LNPs composite films. One-way ANOVA with Tukey's honest significant difference (HSD) all-pairwise comparison test ( $p < 0.05$ ).  $df = 6$  (between) and 21 (within),  $F=2.14$  Italic letters *a-d* indicates statistically significant difference between different groups.

| Material | PS        | PS-GOx-chi-LNPs <sub>2.5</sub> | PS-GOx-chi-LNPs <sub>5</sub> | PS-GOx-chi-LNPs <sub>10</sub> | PS-GOx-chi-LNPs <sub>15</sub> | PS-GOx-chi-LNPs <sub>20</sub> | PS-GOx-chi-LNPs <sub>30</sub> |
|----------|-----------|--------------------------------|------------------------------|-------------------------------|-------------------------------|-------------------------------|-------------------------------|
| Group    | <i>ad</i> | <i>b</i>                       | <i>bc</i>                    | <i>b</i>                      | <i>b</i>                      | <i>ad</i>                     | <i>b</i>                      |

**Table S8.** Statistical analysis of toughness values of PS and PS-GOx-chi-LNPs composite films. One-way ANOVA with Tukey's honest significant difference (HSD) all-pairwise comparison test ( $p < 0.05$ ).  $df = 6$  (between) and 21 (within),  $F=40.75$  Italic letters *a-g* indicates statistically significant difference between different groups.

| Material | PS       | PS-GOx-chi-LNPs <sub>2.5</sub> | PS-GOx-chi-LNPs <sub>5</sub> | PS-GOx-chi-LNPs <sub>10</sub> | PS-GOx-chi-LNPs <sub>15</sub> | PS-GOx-chi-LNPs <sub>20</sub> | PS-GOx-chi-LNPs <sub>30</sub> |
|----------|----------|--------------------------------|------------------------------|-------------------------------|-------------------------------|-------------------------------|-------------------------------|
| Group    | <i>a</i> | <i>b</i>                       | <i>c</i>                     | <i>d</i>                      | <i>e</i>                      | <i>f</i>                      | <i>bg</i>                     |

**Table S9.** Statistical analysis of Young’s modulus values of PBMA and PBMA-GOx-chi-LNPs composite films. One-way ANOVA with Tukey’s honest significant difference (HSD) all-pairwise comparison test ( $p < 0.05$ ).  $df = 6$  (between) and 28 (within),  $F = 124.05$  Italic letters *a–e* indicates statistically significant difference between different groups.

| Material | PBMA     | PBMA-GOx-chi-LNPs <sub>2.5</sub> | PBMA-GOx-chi-LNPs <sub>5</sub> | PBMA-GOx-chi-LNPs <sub>10</sub> | PBMA-GOx-chi-LNPs <sub>15</sub> | PBMA-GOx-chi-LNPs <sub>20</sub> | PBMA-GOx-chi-LNPs <sub>30</sub> |
|----------|----------|----------------------------------|--------------------------------|---------------------------------|---------------------------------|---------------------------------|---------------------------------|
| Group    | <i>a</i> | <i>b</i>                         | <i>c</i>                       | <i>d</i>                        | <i>e</i>                        | <i>d</i>                        | <i>d</i>                        |

**Table S10.** Statistical analysis of tensile strength values of PBMA and PBMA-GOx-chi-LNPs composite films. One-way ANOVA with Tukey’s honest significant difference (HSD) all-pairwise comparison test ( $p < 0.05$ ).  $df = 6$  (between) and 28 (within),  $F = 54.16$  Italic letters *a–e* indicates statistically significant difference between different groups.

| Material | PBMA     | PBMA-GOx-chi-LNPs <sub>2.5</sub> | PBMA-GOx-chi-LNPs <sub>5</sub> | PBMA-GOx-chi-LNPs <sub>10</sub> | PBMA-GOx-chi-LNPs <sub>15</sub> | PBMA-GOx-chi-LNPs <sub>20</sub> | PBMA-GOx-chi-LNPs <sub>30</sub> |
|----------|----------|----------------------------------|--------------------------------|---------------------------------|---------------------------------|---------------------------------|---------------------------------|
| Group    | <i>a</i> | <i>b</i>                         | <i>b</i>                       | <i>c</i>                        | <i>d</i>                        | <i>e</i>                        | <i>e</i>                        |

**Supplementary Table 11.** Statistical analysis of strain at failure values of PBMA and PBMA-GOx-chi-LNPs composite films. One-way ANOVA with Tukey’s honest significant difference (HSD) all-pairwise comparison test ( $p < 0.05$ ).  $df = 6$  (between) and 28 (within),  $F = 3.37$  Italic letters *a–d* indicates statistically significant difference between different groups.

| Material | PBMA     | PBMA-GOx-chi-LNPs <sub>2.5</sub> | PBMA-GOx-chi-LNPs <sub>5</sub> | PBMA-GOx-chi-LNPs <sub>10</sub> | PBMA-GOx-chi-LNPs <sub>15</sub> | PBMA-GOx-chi-LNPs <sub>20</sub> | PBMA-GOx-chi-LNPs <sub>30</sub> |
|----------|----------|----------------------------------|--------------------------------|---------------------------------|---------------------------------|---------------------------------|---------------------------------|
| Group    | <i>a</i> | <i>b</i>                         | <i>bc</i>                      | <i>b</i>                        | <i>ad</i>                       | <i>ad</i>                       | <i>a</i>                        |

**Supplementary Table 12.** Statistical analysis of toughness values of PBMA and PBMA-GOx-chi-LNPs composite films. One-way ANOVA with Tukey’s honest significant difference (HSD) all-pairwise comparison test ( $p < 0.05$ ).  $df = 6$  (between) and 28 (within),  $F = 35.53$  Italic letters *a–e* indicate statistically significant difference between different groups.

| Material | PBMA     | PBMA-GOx-chi-LNPs <sub>2.5</sub> | PBMA-GOx-chi-LNPs <sub>5</sub> | PBMA-GOx-chi-LNPs <sub>10</sub> | PBMA-GOx-chi-LNPs <sub>15</sub> | PBMA-GOx-chi-LNPs <sub>20</sub> | PBMA-GOx-chi-LNPs <sub>30</sub> |
|----------|----------|----------------------------------|--------------------------------|---------------------------------|---------------------------------|---------------------------------|---------------------------------|
| Group    | <i>a</i> | <i>b</i>                         | <i>b</i>                       | <i>c</i>                        | <i>d</i>                        | <i>e</i>                        | <i>ce</i>                       |

Figure S10 show an effective decolorization of ABTS  $^{\bullet+}$  solution (antioxidant scavenging effect) during time in the presence of PBMA-GOx-chi-LNPs<sub>10</sub>.

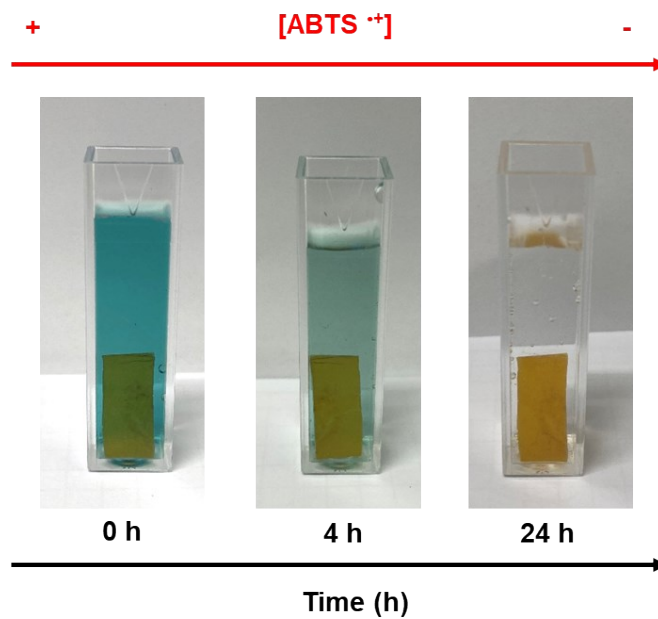

**Figure S10.** Representative digital images taken at different time periods during the antioxidant scavenging of ABTS  $^{\bullet+}$  solution from PBMA-GOx-chi-LNPs<sub>10</sub> composite film

Figure S11 show the evaluation of mechanical properties of PBMA-GO<sub>x</sub>-chi-LNPs<sub>10</sub> composites after antioxidant assay employing ABTS<sup>•+</sup> solution as source of active radicals.

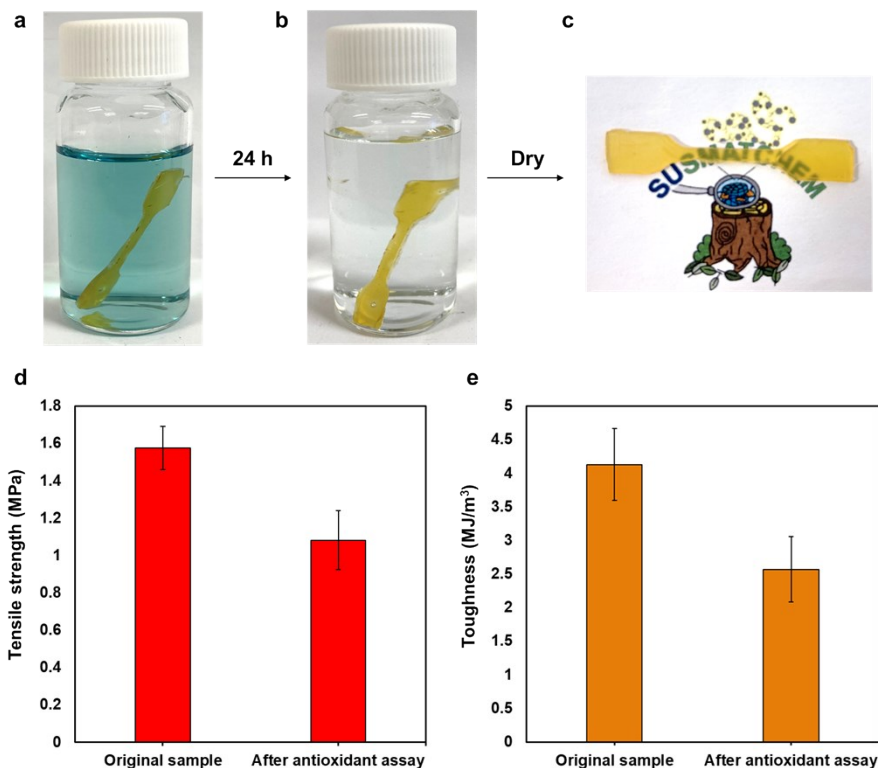

**Figure S11.** Digital images (a, b and c) taken at different time periods during the antioxidant assay from PBMA-GO<sub>x</sub>-chi-LNPs<sub>10</sub> composite film. Mechanical properties of PBMA-GO<sub>x</sub>-chi-LNPs<sub>10</sub> composites: (d) Tensile strength and (e) Toughness before and after the antioxidant assay. In (d and e), the error bars represent ± standard deviation (SD) from the mean values (n=5).

Figure S12 show the possibility to reuse PBMA-GOx-chi-LNPs<sub>10</sub> composite film by melting process.

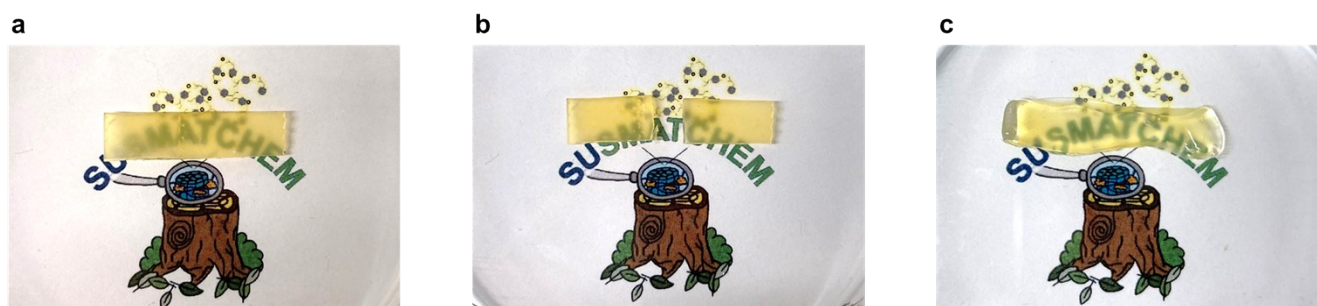

**Figure S12.** (a) PBMA-GOx-chi-LNPs<sub>10</sub> composite film. (b) PBMA-Gox-chi-LNPs<sub>10</sub> film after tensile test. (c) PBMA-GOx-chi-LNPs<sub>10</sub> composite film after recycling by melting process from specimen displayed in b.

## References

---

<sup>1</sup>A. Moreno and M. H. Sipponen, *Nat. Commun.* 2020, **11**, 5599.
